# Supplementary material for: A high-quality reference genome of wild Cannabis sativa
Source: PubMed Central journal article supplement (PMC7195422; doi:10.1038/s41438-020-0295-3), 2020-05-02

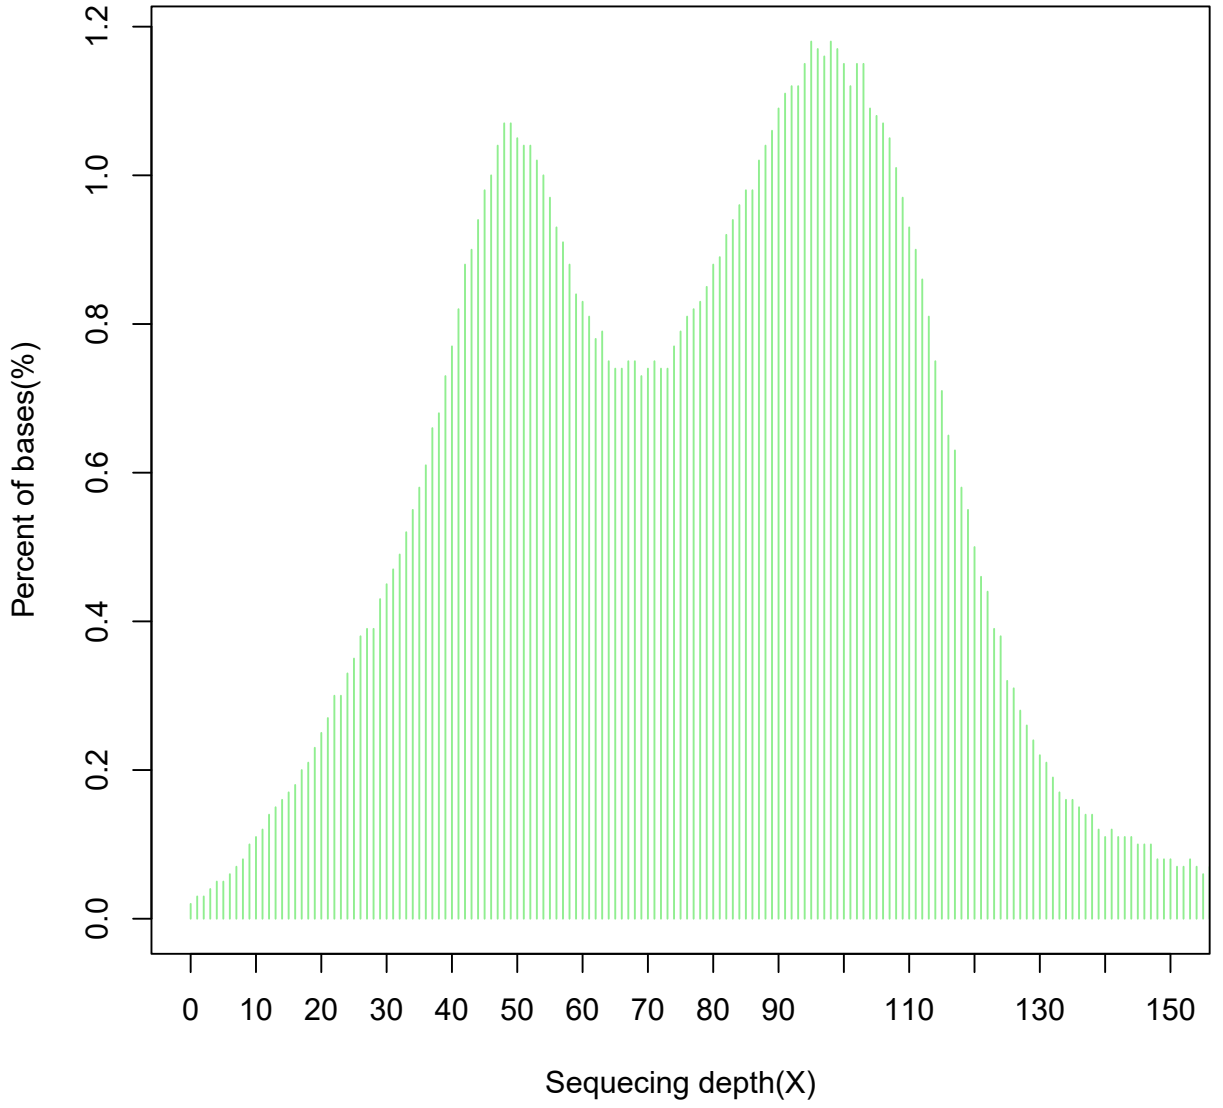

Supplement: 41438_2020_295_MOESM16_ESM.pdf [file 41438_2020_295_MOESM16_ESM.pdf]
